# Supplementary material for: Fibril-shaped aggregates of doxorubicin with poly-l-lysine and its derivative
Source: Royal Society of Chemistry journal article supplement (doi:10.1039/c4py00686k), 2014-01-01
Supplement: c4py00686k1.pdf [file c4py00686k1.pdf]

*Electronic Supplementary Information (ESI)*

**Fibril-shaped aggregates of doxorubicin with poly-L-lysine and its derivative**

Lijun Zhu,<sup>a,b</sup> Saina Yang,<sup>a,b</sup> Xiaozhong Qu,<sup>\*a,b</sup> Feiyan Zhu,<sup>a</sup> Yongri Liang,<sup>b</sup> Fuxin Liang,<sup>b</sup> Qian Wang,<sup>b</sup> Jiaoli Li,<sup>b</sup> Zhibo Li<sup>b</sup> and Zhenzhong Yang<sup>\*b</sup>

<sup>a</sup> *University of Chinese Academy of Sciences, Beijing 100049, China.*

<sup>b</sup> *State Key Laboratory of Polymer Physics and Chemistry, Institute of Chemistry, Chinese Academy of Sciences, Beijing 100190, China.*

**Supplementary Figures and Table**

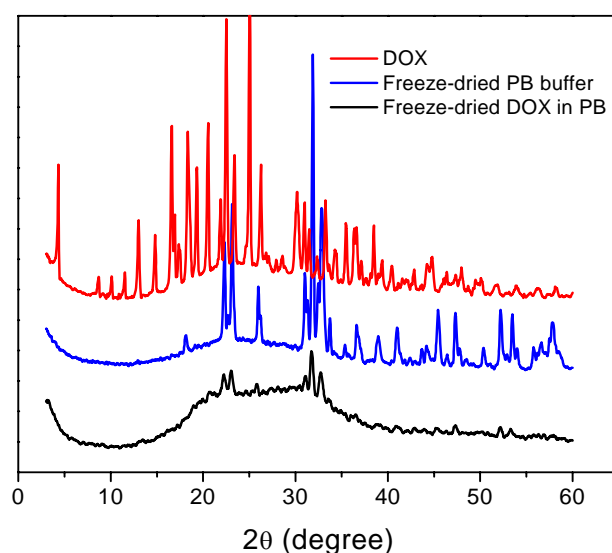

**Figure S1** X-ray diffraction of freeze-dried water solution of DOX (red line), PB buffer (blue line) and buffer solution of DOX (black line). Before freeze-dry, the concentration of PB buffer and DOX is 10 mM and 300  $\mu\text{g/mL}$  (0.5 mM) respectively.

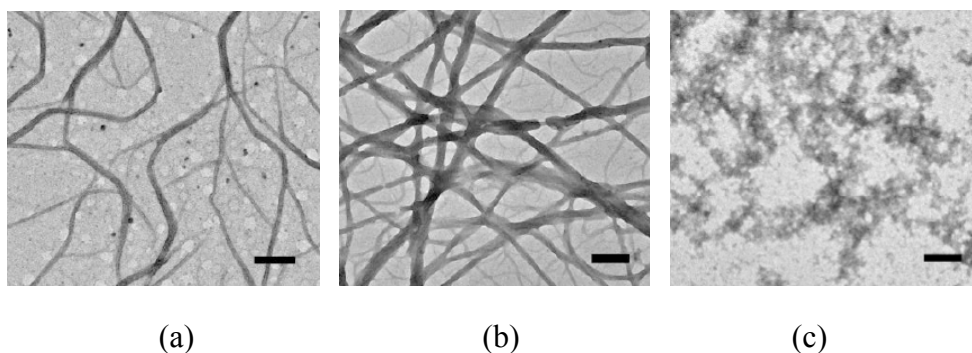

**Figure S2** TEM images of PLL/DOX complexes (1/1, w/w) in 10 mM PB buffer at pH 5.0 (a), 7.4 (b) and 10.0 (c). The concentration of DOX is 300  $\mu\text{g/mL}$  (0.5 mM).

Scale bars represent 200 nm.

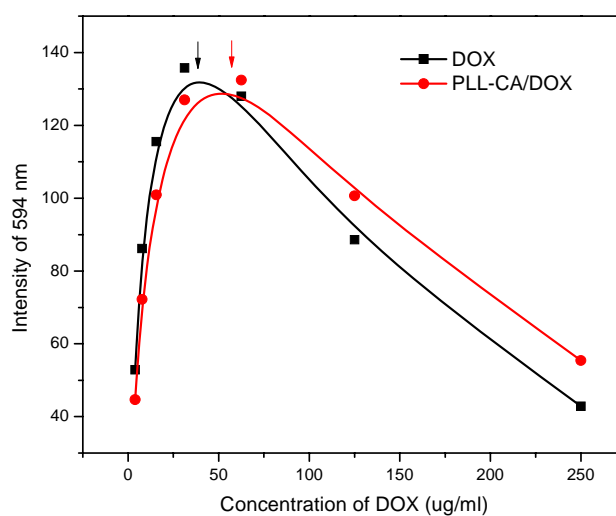

**Figure S3** Fluorescence intensity of DOX and PLL-CA/DOX as a function of drug concentration in PB buffer (10 mM, pH 7.4). The weight ratio of PLL-CA/DOX was 1:0.5, and the excitation wavelength was 485 nm.

### Supplementary Table

Table S1. Average width and length of PLL-CA/DOX aggregates measured from

| TEM images            |            |             |
|-----------------------|------------|-------------|
| PLL-CA / DOX<br>(w/w) | Width / nm | Length / nm |
| 1:0.33                | 240±4      | 525±30      |
| 1:0.5                 | 204±14     | 554±24      |
| 1:0.75                | 100±9      | 615±42      |
| 1:1                   | 93±7       | Fibril      |
| 1:3                   | 54±4       | Fibril      |
